# Supplementary material for: A Zebrafish Model of Neurotoxicity by Binge-Like Methamphetamine Exposure
Source: Front Pharmacol. 2021 Nov 22;12:770319. doi: 10.3389/fphar.2021.770319 (PMC8646101; doi:10.3389/fphar.2021.770319)
Supplement: Supplementary file 2 [file DataSheet2.xlsx]

## Sheet: NTT
		3 h									48 h
		DISTANCE TOP	TOTAL DISTANCE	ENTRANCE TOP	TIME TOP	LATENCY TOP	IMMOBILITY				DISTANCE TOP	TOTAL DISTANCE	ENTRANCE TOP	TIME TOP	LATENCY TOP	IMMOBILITY
		cm	cm		s	s	s				cm	cm		s	s	s
Control (20 mg/L group)	Ctl1	386.792	1680.95	18	66.266	54.5995	8.25		Control (20 mg/L group)	Ctl1	455.743	1410.21	20	102.399		0
	Ctl2	693.977	929.138	5	153.065	206.065	20.063			Ctl2	120.104	1416.41	12	19.8665	167.632	0
	Ctl3	77.9225	2028.46	7	13.7332	290.264	0			Ctl3	676.912	2265.94	32	95.0657	122.499	0
	Ctl4	114.733	1881.12	11	14.2665	143.232	0			Ctl4	0.722625	1591.51	1	0.066666	345.763	0
	Ctl5	755.974	2100.18	17	106.999	117.599	4.70327			Ctl5	1902.63	1902.63	0	0	360	0
	Ctl6	1870.91	2381.22	13	271.697	44.1996	0			Ctl6	436.446	2167.87	13	44.4996	26.0331	0
	Ctl7	1474.73	2157.23	62	254.097	33.3663	6.2037			Ctl7	771.425	1929.33	31	123.165	4.63329	0
	Ctl8	941.154	2152.85	36	128.699	48.4662	0			Ctl8	925.552	2337.73	64	84.2658	26.6664	0
	Ctl9	1437.34	1462.64	3	358.23	0.699993	16.4907			Ctl9	146.944	1519.71	14	25.0997	232.531	2.03331
	Ctl10	123.576	1767.79	7	14.9998	316.564	10.3148			Ctl10	1457.61	2168.84	68	241.931	25.6664	0
	Ctl11	1453.2	1741.84	26	249.331	76.9326	19.5445			Ctl11	373.429	1848.37	8	52.7328	220.531	0
	Ctl12	1523.87	2106.37	3	272.197	41.3329	0			Ctl12		1145.4	0	0	360	29.4997
	Ctl13	-	1397.17	0	0	-	22.787			Ctl13	383.919	1396.61	24	90.6991	41.9662	0
	Ctl14	1853.47	2491.52	49	270.364	0.899991	0		20 mg/L METH	M201	218.363	1486.35	12	41.0329	140.832	32.7663
	Ctl15	788.813	1995.43	36	127.832	18.0998	0			M202	0	907.158	0	0	360	70.566
	Ctl16	932.066	1760.2	24	199.565	38.5329	0			M203	416.964	1253.91	3	97.4324		0
20 mg/L METH	M201	0	1397.19	0	0	360	22.7778			M204	0	806.482	0	0	360	55.3994
	M202	1192.44	1692.99	17	255.297		0			M205	0	797.218	0	0	360	77.6326
	M203	0	1192.1	0	0	360	4.05556			M206	0	196.191	0	0	360	303.497
	M204	0	980.353	0	0	360	10.713			M207	0	1697.54	0	0	360	16.9665
	M205	193.41	1351.3	4	26.8664		0			M208	0	995.846	0	0	360	11.5332
	M206	0	833.853	0	0	360	18.0741			M209	0	51.713	0	0	360	352.196
	M207	134.63	1583.64	3	18.8331	1.53332	0			M210	0	1193.8	0	0	360	0
	M208	0	1615.86	0	0	360	16.1296			M211	6.60716	1193.88	1	1.79998	309.364	0
	M209	0	1053.09	0	0	360	40.5981			M212	0	996.853	0	0	360	55.8661
	M210	0	1307.75	0	0	360	9			M213	145.863	1048.27	2	40.6663	137.899	31.933
	M211	90.3135	1484.07	2	18.0665	164.565	0			M214	322.44	764.536	4	174.965		44.8662
	M212	33.1444	1195.73	1	3.69996	66.666	0			M215	0	594.629	0	0	360	32.2997
	M213	187.038	1263.39	5	37.0663	30.4997	7.69444			M216	847.241	1753.37	13	153.865	73.9659	28.533
	M214	9.87271	1017.28	2	2.53331		0
	M215	0	118.059	0	0	360	91.8704
	M216	652.429	1771.24	11	130.099	11.4999	0
Control (40 mg/L group)	Ctl1	901.127	2195.82	34	114.632	137.632	0		Control (40 mg/L group)	Ctl1	90.1111	1254.85	7	18.4331	124.332	10.0666
	Ctl2	852.084	2400.59	35	105.266	135.565	11.5666			Ctl2	2311.98	2471.09	60	328.73	0.799992	0
	Ctl3	1113.76	1528.95	13	248.464	47.6995	71.4993			Ctl3	72.1691	1275.4	5	14.2999	281.631	28.733
	Ctl4	1240.26	2480.32	51	169.798	34.4663	0			Ctl4	0	1379.79	0	0		28.5664
	Ctl5	977.176	2748.1	41	104.299	7.29993	0			Ctl5	2307.11	2457.67	59	328.43	12.8999	0
	Ctl6	1007.24	2060.48	7	134.965	35.1996	19.9331			Ctl6	0	991.239	0	0		74.8326
	Ctl7	11.0455	2499.69	2	1.33332	345.963	0			Ctl7	0	1636.76	1	0.233331	330.397	13.8999
	Ctl8	1311.93	2929.6	57	144.199	21.2998	0			Ctl8	23.7938	1815.24	1	29.5997	1.46665	0
	Ctl10	333.709	1061.09	22	27.0664	35.633	183.965			Ctl10	1176.11	1568.92	89	240.998	27.9997	4.16662
	Ctl11	118.869	1843.23	12	19.3998	238.698	45.5995			Ctl11	289.13	1158.99	7	38.9996	81.5992	79.7659
	Ctl12	974.194	2782.9	37	96.6657	7.73326	6.73327			Ctl12	712.248	1918.73	11	72.1326	9.6999	0.099999
	Ctl13	968.086	3291.11	48	88.7658	106.632	0			Ctl13	11.6868	2127.59	2	1.96665	307.297	0
	Ctl14	1440.16	2326.48	16	242.531	41.6996	0			Ctl14	473.404	2622.3	34	49.0328	130.332	0
	Ctl15	620.632	2740.76	17	69.0993	4.53329	0			Ctl15	1112.93	1903.73
40 mg/L METH	M201	0	14.8235	0	0	360	323.763		40 mg/L METH	M201	0	467.309	0	0	360	236.331
	M202	0	19.9342	0	0	360	359.996			M202	0	892.775	0	0	360	28.4997
	M203	0	1296.13	0	0	360	0			M203	0	79.6061	0	0	360	345.23
	M204	25.0325	1372.61	1	2.39998	123.732	27.5664			M204	0	1037.2	0	0	360	0
	M205	0	1554.12	0	0	360	0			M205	0	819.578	0	0	360	41.4329
	M206	0	80.5739	0	0	360	324.53			M206	0	1119.8	0	0	360	0
	M207	0	270.244	0	0	360	276.531			M207	0	797.086	0	0	360	10.5666
	M208	0	886.606	0	0	360	62.466			M208	51.2405	748.955	5	0.466662	0.799992	107.499
	M209	0	11.1486	0	0	360	359.963			M209	0	23.0482	0	0	360	359.963
	M210	0	112.36	0	0	360	337.23			M210	0	1207.59	0	0	360	0
	M211	0	1192.65	0	0	360	57.9661			M211	0	843.606	0	0	360	0
	M212	0	166.27	0	0	360	327.53			M212	0	1230.07	0	0	360	0
	M213	0	1039.33	0	0	360	35.7996			M213	8.72092	1075.92	1	0.033333	25.4997	34.2997
	M214	15.6494	1002.29	1	2.43331	151.265	38.5329			M214		893.28	0	0	360	50.6328
	M215	20.4543	1500.1	1	0.166665	234.298	29.1664			M215	117.316	1058.4	4	24.3331	287.564	57.8994

## Sheet: Motor activity
			Distance	Distance	Distance
			0-1h	1-2h	2-3h
			cm	cm	cm
	Control	Control 1	8056.28	9196.65	9661.08
		Control 2	8646.19	9338.73	10252
		Control 3	7908.78	9566.89	9971.4
		Control 4	8460.86	9768.58	10275.4
		Control 5	8498.26	8694.62	10054.4
		Control 6	8443.1	8914.71	9744.53
		Control 7	8949.71	9797.64	9364.78
		Control 8	9183.18	9587.65	8651.19
		Control 9	8936.57	9947.44	9192.45
		Control 10	9363.17	9808.89	9239.88
		Control 11	9361.86	9692.41	9067.29
		Control 12	9348.31	9747.7	9528.91
	40 mg/L METH	METH1	11041.1	9492.68	9227.44
		METH2	11149.7	9796.37	9375.54
		METH3	11238.6	9659.53	9438.37
		METH4	11363.6	9748.61	9461.84
		METH5	10933.8	9968.1	9491.94
		METH6	11132.7	9679.58	9642.99
		METH7	10248	9504.42	10563.7
		METH8	10176.2	9730.41	10496.8
		METH9	10550.6	10170.5	10898.9
		METH10	11055.1	10342.9	10540.3
		METH11	10883.4	10518.2	10835.8
		METH12	10724.3	10195.3	10842.2

## Sheet: LDT
			3 h						48 h
			TIME IN WHITE	ENTRANCES IN WHITE	AVERAGE ENTRANCE DURATION				TIME IN WHITE	ENTRANCES IN WHITE	AVERAGE ENTRANCE DURATION
			s		s				s		s
	Control	C1	30.6664	13	2.35895		Control	C1	53.0328	10	5.30328
		C2	35.5996	9	3.95551			C3	16.9998	22	0.772718
		C3	0	0	-			C4	23.8998	6	3.9833
		C4	1.69998	3	0.56666			C5	4.83329	4	1.20832
		C5	15.7332	7	2.2476			C6	0.633327	4	0.158332
		C6	108.432	27	4.016			C7	9.5999	1	9.5999
		C7	22.8998	18	1.27221			C8	4.06663	8	0.508329
		C8	71.6326	1	71.6326			C9	1.89998	10	0.189998
		C10	0.99999	1	0.99999			C10	2.16664	2	1.08332
		C11	58.1994	29	2.00688			C11	0.66666	2	0.33333
		C12	14.8332	18	0.824067			C12	56.5328	11	5.13935
		C13	76.8326	23	3.34055			C13	5.23328	3	1.74443
		C14	4.83329	12	0.402774			C14	6.99993	11	0.636357
		C17	37.7663	14	2.69759			C15	6.59993	5	1.31999
		C18	7.43326	4	1.85831			C16	69.4993	11	6.31812
	40 mg/L METH	M2	359.996	1	359.996			C17	23.0664	9	2.56293
		M3	304.63	1	304.63			C18	2.06665	6	0.344442
		M4	359.996	1	359.996			C19	10.3666	19	0.545611
		M5	1.49998	3	0.499993		40 mg/L METH	M1	285.33	2	142.665
		M6	359.996	1	359.996			M2	42.2662	4	10.5665
		M7	9.53324	4	2.38331			M3	0	0
		M8	267.531	3	89.177			M4	359.996	1	359.996
		M9	337.03	1	337.03			M5	8.06659	2	4.03329
		M10	359.996	1	359.996			M6	3.86663	18	0.214813
		M13	4.36662	1	4.36662			M7	360.03	1	360.03
		M14	359.996	1	359.996			M8	359.996	1	359.996
		M15	152.132	2	76.066			M9	88.6658	3	29.5553
		M16	1.86665	1	1.86665			M10	3.39997	19	0.178946
		M17	0.233331	1	0.233331			M11	104.932	2	52.466
		M18	4.26662	2	2.13331			M12	2.86664	4	0.71666
								M13	359.796	2	179.898
								M14	110.866	26	4.26408
								M15	257.931	7	36.8473
								M16	0	0
								M17	257.331	5	51.4662
								M18	359.996	1	359.996

## Sheet: Shoaling
			3 h					48 h
			Average Interfish Distance	Farthest Distance				Average Interfish Distance	Farthest Distance
			cm	cm				cm	cm
	Control	Subject 1	5.2002	5.42499		Control	Subject 1	4.81236	5.15557
		Subject 2	5.31372	5.58086			Subject 2	4.71892	5.10523
		Subject 3	5.40132	5.64528			Subject 3	4.92758	5.17303
		Subject 4	5.20788	5.44377			Subject 4	4.85603	5.18696
		Subject 5	5.40171	5.64528			Subject 5	4.72043	5.00803
		Subject 6	5.11947	5.34847			Subject 6	4.74204	5.17303
		Subject 7	5.20937	5.64346			Subject 7	4.79833	5.18696
		Subject 8	5.2038	5.48219			Subject 8	4.89702	5.1054
		Subject 9	5.35696	5.61754			Subject 9	4.74796	5.15557
		Subject 10	4.88386	5.18926			Subject 10	4.53772	4.81075
		Subject 11	4.69366	4.84428			Subject 11	4.41482	4.70562
		Subject 12	4.8121	5.06673			Subject 12	4.29785	4.98468
		Subject 13	5.02144	5.2856			Subject 13	4.49334	4.733
		Subject 14	5.00615	5.2856			Subject 14	4.47846	4.70562
		Subject 15	4.95017	5.25115			Subject 15	4.42352	4.68968
		Subject 16	4.86759	5.38576			Subject 16	4.3271	4.53945
		Subject 17	4.92153	5.11578			Subject 17	4.61691	4.98468
		Subject 18	4.94615	5.38576			Subject 18	4.42299	4.81075
	40 mg/L METH	Subject 1	4.81236	5.15557		40 mg/L METH	Subject 1	5.19938	5.38598
		Subject 2	4.71892	5.10523			Subject 2	5.14627	5.62872
		Subject 3	4.92758	5.17303			Subject 3	5.15264	5.55185
		Subject 4	4.85603	5.18696			Subject 4	5.27298	5.55188
		Subject 5	4.72043	5.00803			Subject 5	5.03337	5.55188
		Subject 6	4.74204	5.17303			Subject 6	4.9933	5.29263
		Subject 7	4.79833	5.18696			Subject 7	5.074	5.62872
		Subject 8	4.89702	5.1054			Subject 8	5.02922	5.29501
		Subject 9	4.74796	5.15557			Subject 9	5.00471	5.17217
		Subject 10	4.53772	4.81075			Subject 10	5.51593	5.70172
		Subject 11	4.41482	4.70562			Subject 11	5.7036	5.96431
		Subject 12	4.29785	4.98468			Subject 12	5.34708	5.87055
		Subject 13	4.49334	4.733			Subject 13	5.52248	5.72074
		Subject 14	4.47846	4.70562			Subject 14	5.69516	6.17745
		Subject 15	4.42352	4.68968			Subject 15	5.69994	6.13643
		Subject 16	4.3271	4.53945			Subject 16	5.62621	6.11902
		Subject 17	4.61691	4.98468			Subject 17	5.57223	6.13643
		Subject 18	4.42299	4.81075			Subject 18	5.57798	6.17745

## Sheet: SPT
			3 h										48 h
			DISTANCE IN NEAR	DISTANCE IN INTERMEDIATE	DISTANCE IN FAR	TIME IN NEAR	TIME IN INTERMEDIATE	TIME IN FAR					DISTANCE IN NEAR	DISTANCE IN INTERMEDIATE	DISTANCE IN FAR	TIME IN NEAR	TIME IN INTERMEDIATE	TIME IN FAR
			cm	cm	cm	s	s	s					cm	cm	cm	s	s	s
	Control	C1	801.46	348.504	203.111	249.998	59.1661	48.7662			Control	C1	1024.31	652.845	170.622	225.831	107.466	18.2665
		C2	1780.3	1120.38	747.758	164.865	106.299	84.4992				C2	666.154	516.729	427.96	138.765	106.066	111.566
		C3	564.087	605.507	342.874	146.799	124.599	83.5992				C3	563.984	739.42	429.486	134.632	136.465	84.0992
		C4	857.589	413.508	259.021	237.531	63.766	56.9328				C4	623.818	489.958	221.341	178.498	117.832	60.1327
		C5	1242.65	326.472	249.217	262.309	41.4575	55.0879				C5	1120.38	376.417	287.189	263.497	52.5661	41.5996
		C6	502.59	238.943	99.3916	221.864	84.9325	48.3329				C6	298.98	322.081	147.75	166.632	114.032	74.8326
		C7	550.374	452.77	596.757	144.032	83.5325	101.266				C7	850.26	586.827	285.093	203.065	106.332	46.6995
		C8	1580.07	261.477	120.833	308.599	26.2942	24.028				C8	1288.63	-	-	359.996	0	0
		C9	1009.02	164.96	98.3361	284.697	45.5995	23.8664				C9	649.36	748.818	549.091	125.499	132.565	96.8657
		C10	807.228	308.438	232.424	117.512	25.1157	20.3825				C10	302.995	189.735	72.1257	329.097	20.5331	7.59992
		C11	574.594	674.417	740.1	97.3727	106.304	151.991				C11	746	266.89	486.205	217.364	41.3329	99.199
		C12	1032.44	353.398	176.079	272.231	56.0661	29.6997				C12	428.983	454.685	347.222	126.465	130.399	85.3991
		C13	551.153	553.576	441.894	84.6633	49.848	33.7653				C13	693.675	364.917	161.666	214.898	98.0657	43.0329
		C14	671.622	716.537	496.077	117.641	123.773	114.208				C14	716.895	778.878	444.561	144.165	145.832	60.9994
		C15	581.151	496.502	404.361	171.698	98.9657	85.1658				C15	669.988	431.996	273.317	199.531	95.3324	61.766
		C16	767.889	552.205	433.395	195.565	94.0657	60.5327				C16	338.598	602.328	449.959	121.132	136.399	98.0324
		C17	489.118	698.262	669.258	97.3452	126.639	132.504				C17	659.805	606.483	347.43	150.565	133.165	71.7659
		C18	1137.96	404.531	282.561	238.731	68.166	50.5328				C18	764.135	274.964	65.0955	251.964	51.9328	52.8661
		C19	875.28	155.661	52.5313	331.197	18.6331	9.73324				C19	780.295	674.773	489.247	155.632	112.232	88.4658
		C20	860.973	382.121	223.571	227.87	71.3134	57.6838			40 mg/L METH	C20	602.221	436.137	584.649	170.765	65.4327	109.999
	40 mg/L METH	M1	587.371	506.379	350.091	128.799	95.999	132.399				M1	29.5965	45.9265	28.6494	8.53325	14.0665	336.897
		M2	297.945	645.107	536.909	89.2324	121.232	145.265				M2	211.569	284.252	103.248	95.2324	82.6658	178.565
		M3	526.887	805.713	394.393	115.299	147.865	92.3657				M3	96.5647	343.38	142.16	174.332	120.099	61.966
		M4	346.641	699.946	278.509	108.366	167.432	79.9325				M4	28.704	62.7258	61.0312	67.7993	209.265	82.5325
		M5	332.008	895.786	513.282	77.2163	164.097	113.908				M5	487.318	652.92	361.969	110.999	143.765	100.132
		M6	655.92	567.167	227.515	164.598	138.932	52.8661				M6	133.516	283.792	127.209	54.8995	133.332	163.932
		M7	551.377	673.674	236.393	75.2803	70.5138	31.4487				M7	384.687	621.624	437.234	79.3992	185.265	91.2658
		M8	638.057	765.288	410.048	121.11	128.576	106.88				M8	156.677	142.531	51.6786	330.497	20.8998	7.76659
		M9	381.288	411.613	216.557	156.898	121.932	77.2659				M9	481.097	592.415	180.296	150.565	152.732	51.1662
		M10	558.533	635.122	136.657	82.53	70.9972	22.1491				M10	53.8853	221.281	178.363	33.7997	151.598	146.099
		M11	398.508	577.188	164.872	97.3452	137.037	121.54				M11	894.996	321.38	102.736	272.697	67.7993	17.2998
		M12	304.015	655.89	224.107	108.466	170.398	76.1659				M12	78.8484	140.577	130.362	27.9664	82.5992	247.531
		M13	253.37	477.575	225.428	44.2982	82.1467	49.3647				M13	426.613	450.579	330.68	114.332	103.732	137.632
		M14	225.395	523.212	273.465	54.4181	222.738	79.2445				M14	157.075	84.3992	2.23123	171.265	43.3329	1.19999
		M15	312.513	539.492	316.642	101.732	151.298	102.832				M15	135.686	230.079	174.933	205.298	91.1658	60.9994
		M16	660.88	928.374	348.612	150.932	137.099	66.966				M16	379.431	529.941	295.32	151.298	128.132	76.5659
		M17	108.154	276.02	194.422	37.2929	67.8204	252.885				M17	201.808	395.14	216.939	70.6326	213.431	70.4993
		M18	946.862	685.084	146.17	209.898	113.699	32.333				M19	23.9007	73.4993	24.8516	8.69991	324.13	26.0331
		M19	571.721	663.734	380.252	139.299	116.166	100.099				M20	589.775	691.881	345.448	123.765	137.032	92.9991
		M20	351.995	696.642	542.219	87.4808	131.204	137.67
